# Supplementary material
Source: ML conference proceedings conference paper supplement (https://proceedings.mlr.press/v119/oyallon20a.html)
Supplement: Supplementary file [file oyallon20a-supp.pdf]

## A. Proof that $L$ is concave and positive.

We will use the notations previously introduced as well as:

$$z_p = U_n x_p.$$

As  $L(W) = \sum_p \ell(W, z_p)$ , we will simply study  $\forall z$ ,

$$W \rightarrow \ell(W, z) = \|(\mathbf{I} - A)z\|^2 - \|A|Wz|\|^2.$$

Observe first that if  $\|\{W, A\}\| \leq 1$ , then  $\|A\| \leq 1$ , and:

$$\|Wz\| \leq \|(\mathbf{I} - A)z\|$$

Thus,

$$\| |Wz| \| \leq \|(\mathbf{I} - A)z\|$$

and:

$$\|A|Wz|\| \leq \|(\mathbf{I} - A)z\|.$$

Consequently,  $\ell(W, z) \geq 0, \forall z, \forall W \in \mathcal{C}$ . Furthermore, let  $W_1, W_2 \in \mathcal{C}$  two operators and  $0 \leq \lambda \leq 1$ . Then:

$$|(\lambda W_1 + (1 - \lambda)W_2)z| \leq \lambda |W_1|z + (1 - \lambda)|W_2|z$$

where for  $x \in \mathbb{R}^n$ ,  $x \geq 0$  iff  $x_i \geq 0$ . If  $Ax > 0$  when  $x > 0$ , then:

$$A|(\lambda W_1 + (1 - \lambda)W_2)z| \leq \lambda A|W_1|z + (1 - \lambda)A|W_2|z,$$

which implies (as all coordinates are non negative):

$$\|A|(\lambda W_1 + (1 - \lambda)W_2)z|\|^2 \leq \|\lambda A|W_1|z + (1 - \lambda)A|W_2|z\|^2,$$

yet one can use the fact that  $z \rightarrow \|z\|^2$  is convex to conclude. Thus,  $W \rightarrow \ell(W, z)$  is convex in  $W$ .

## B. Proof of Proposition 3.5

*Proof.* Observe that  $\mathcal{F}$  linearly conjugates  $\mathcal{C}$  to  $\{\hat{W} \in \mathbb{C}^{(2d+1) \times K}, \sum_{k=1}^K |\hat{W}^k[i]|^2 + |W^k[2d+1-i]|^2 + |\hat{A}[i]|^2 + |\hat{A}[2d+1-i]|^2 \leq 1, \forall i \leq d, \sum_{k=1}^K |W^k[2d+1]|^2 + |\hat{A}[2d+1]|^2 \leq 1\}$ . The extremal points of the latter are simply  $\mathcal{S}' = \{\hat{W} \in \mathbb{C}^{(2d+1) \times K}, \sum_{k=1}^K |\hat{W}^k[i]|^2 + |W^k[2d+1-i]|^2 + |\hat{A}[i]|^2 + |\hat{A}[2d+1-i]|^2 = 1, \forall i \leq d, \sum_{k=1}^K |W^k[2d+1]|^2 + |\hat{A}[2d+1]|^2 = 1\}$ , which is conjugated by  $\mathcal{F}^*$  to  $\mathcal{S}$ . But  $\mathcal{S}'$  corresponds to the spectrum of an isometry, leading to the conclusion.  $\square$
